# Supplementary material for: Molecular Subtypes, microRNAs and Immunotherapy Response in Metastatic Colorectal Cancer
Source: MDPI journal article supplement (doi:10.3390/medicina60030397), 2024-02-26
Supplement: s1 [file s1]

## Review

# Molecular Subtypes, microRNAs and Immunotherapy Response in Metastatic Colorectal Cancer

Alexandra Gherman <sup>1,2</sup>, Dinu Bolundut <sup>2</sup>, Radu Ecea <sup>2</sup>, Loredana Balacescu <sup>3</sup>, Sebastian Curcean <sup>4,5</sup>, Constantin Dina <sup>6,\*</sup>, Ovidiu Balacescu <sup>3,\*</sup> and Calin Cainap <sup>1,2</sup>

<sup>1</sup> 10th Department of Medical Oncology, University of Medicine and Pharmacy “Tuliu Hatieganu”, 8 Victor Babes Street, 400012 Cluj-Napoca, Romania; allexandragherman@gmail.com (A.G.); calincainap2015@gmail.com (C.C.)

<sup>2</sup> Department of Medical Oncology, The Oncology Institute “Prof. Dr. Ion Chiricuta”, 34-36 Republicii Street, 400015 Cluj-Napoca, Romania; dinubolundut@yahoo.ro (D.B.); radu.ecea@gmail.com (R.E.)

<sup>3</sup> Department of Genetics, Genomics and Experimental Pathology, The Oncology Institute “Prof. Dr. Ion Chiricuta”, 400015 Cluj-Napoca, Romania; loredana\_balacescu@yahoo.com

<sup>4</sup> 10th Department of Radiation Oncology, University of Medicine and Pharmacy “Tuliu Hatieganu”, 8 Victor Babes Street, 400012 Cluj-Napoca, Romania; sebastian.curcean@gmail.com

<sup>5</sup> Department of Radiation Oncology, The Oncology Institute “Prof. Dr. Ion Chiricuta”, 34-36 Republicii Street, 400015 Cluj-Napoca, Romania

<sup>6</sup> Department of Anatomy, Faculty of Medicine, Ovidius University, 124 Mamaia Boulevard, 900527 Constanta, Romania

\* Correspondence: constantin.dina@gmail.com (C.D.); obalacescu@yahoo.com (O.B.)

**Table S1.** a. TNM staging for colon cancer, 8<sup>th</sup> ed, 2017. American Joint Committee on Cancer (AJCC) [1].

| T Category | T Criteria                                                                                                                               |
|------------|------------------------------------------------------------------------------------------------------------------------------------------|
| Tx         | Primary tumor cannot be assessed                                                                                                         |
| T0         | No evidence of primary tumor                                                                                                             |
| Tis        | Carcinoma in situ, intramucosal carcinoma                                                                                                |
| T1         | Tumor invades the submucosa                                                                                                              |
| T2         | Tumor invades the muscularis propria                                                                                                     |
| T3         | Tumor penetrating the muscularis propria into pericolorectal fat tissue                                                                  |
| T4         | Tumor directly invading the visceral peritoneum or adhering to other organs/structures                                                   |
| cT4a       | Tumor penetrating visceral peritoneum                                                                                                    |
| cT4b       | Tumor directly invades or adheres to adjacent organs or structures                                                                       |
| N Category | N Criteria                                                                                                                               |
| Nx         | Regional lymph nodes cannot be assessed                                                                                                  |
| N0         | No regional lymph node metastasis and no tumor deposits                                                                                  |
| N1         | 1-3 lymph nodes metastases or tumor deposits present without lymph nodes metastases                                                      |
| N1a        | 1 regional lymph node metastases                                                                                                         |
| N1b        | 2-3 regional lymph nodes metastases                                                                                                      |
| N1c        | Tumor deposits in the subserosa, mesentery or non-peritonealized, pericolic or perirectal/ mesorectal tissues; no lymph nodes metastases |
| N2         | ≥4 regional nodes metastases                                                                                                             |
| N2a        | 4-6 regional lymph nodes metastases                                                                                                      |
| N2b        | ≥7 regional lymph nodes metastases                                                                                                       |
| M Category | M Criteria                                                                                                                               |
| M0         | No distant metastasis                                                                                                                    |
| M1         | Metastasis to one or more distant sites or organs                                                                                        |
| M1a        | Metastasis to one site/ organ, no peritoneal metastasis                                                                                  |

|     |                                                                |
|-----|----------------------------------------------------------------|
| M1b | Metastasis to $\geq 2$ sites/ organs, no peritoneal metastasis |
| M1c | Peritoneal metastasis +/- other sites of metastasis            |

**Table S1.** b. AJCC prognostic groups. TNM staging for colon cancer, 8<sup>th</sup> ed, 2017. American Joint Committee on Cancer (AJCC) [1].

|            | <b>T</b> | <b>N</b> | <b>M</b> |
|------------|----------|----------|----------|
| Stage O    | Tis      | N0       | M0       |
| Stage I    | T1, T2   | N0       | M0       |
| Stage IIA  | T3       | N0       | M0       |
| Stage IIB  | T4a      | N0       | M0       |
| Stage IIC  | T4b      | N0       | M0       |
| Stage IIIA | T1, T2   | N1/N1c   | M0       |
|            | T1       | N2a      | M0       |
| Stage IIIB | T3, T4a  | N1/N1c   | M0       |
|            | T2, T3   | N2a      | M0       |
|            | T1, T2   | N2b      | M0       |
| Stage IIIC | T4a      | N2a      | M0       |
|            | T3-T4a   | N2b      | M0       |
|            | T4b      | N1, N2   | M0       |
| Stage IVA  | Any T    | Any N    | M1a      |
| Stage IVB  | Any T    | Any N    | M1b      |
| Stage IVC  | Any T    | Any N    | M1c      |

## Reference

1. Amin, M.B.; Edge, S.; Greene, F.; Byrd, D.R.; Brookland, R.K.; Washington, M.K.; Gershenwald, J.E.; Compton, C.C.; Hess, K.R.; Sullivan, D.C.; et al. *AJCC Cancer Staging Manual*, 8th ed.; Springer: Cham, Switzerland, 2017.
